# Supplementary material for: PSMA-homing dsRNA chimeric protein vector kills prostate cancer cells and activates anti-tumor bystander responses
Source: PubMed Central journal article supplement (PMC5421826; doi:10.18632/oncotarget.15733), 2017-02-25
Supplement: oncotarget-08-24046-s001.pdf [file oncotarget-08-24046-s001.pdf]

## PSMA-homing dsRNA chimeric protein vector kills prostate cancer cells and activates anti-tumor bystander responses

### Supplementary Material

#### DNA and protein sequences of A. GFP-SCP and B. dsRB-SCP

##### A.

GFP-SCP DNA sequence: (b.p=1554)

```
ATGGGCAGCAGCCATCATCATCATCACAGCAGCGGCCTGGTGCCGCGCGGCAGCCATAT
GGTGAGCAAGGGCGAGGAGCTGTTACCGGGGTGGTGCCATCCTGGTCGAGCTGGACGGCG
ACGTAACCGCCACAAGTTCAGCGTGTCCGGCGAGGGCGAGGGCGATGCCACCTACGGCAAG
CTGACCCTGAAGTTCATCTGCACCACCGCAAGCTGCCCCGTGCCCTGGCCCACCCTCGTGACC
ACCCTGACCTACGGCGTGCAGTGCTTCAGCCGCTACCCCCGACCACATGAAGCAGCAGCAGCTTC
TTCAAGTCCAGTACAGCCATGCCCCGAAGGCTACGTCCAGGAGCGCACCATCTTCTTCAAGGACGACGGC
AACTACAAGACCCGCGCCGAGGTGAAGTTCGAGGGCGACACCCTGGTGAACCGCATCGAGCT
GAAGGGCATCGACTTCAAGGAGGACGGCAACATCCTGGGGCACAAGCTGGAGTACAATAACA
ACAGCCACAACGTCTATATCATGGCCGACAAGCAGAAGAACGGCATCAAGGTGAAGTCAAG
ATCCGCCACAACATCGAGGACGGCAGCGTGCAGCTCGCCGACCACTACCAGCAGAACACCCC
CATCGGCGCAGCGCCCGTGTGCTGCTGCCGACAACCACTACCTGAGCACCCAGTCCGCCCTGAG
CAAAGACCCCAACGAGAAGCGGATCACATGGTCTGCTGGAGTTCGTGACCGCCCGCCGGGA
TCACTCTCGGCATGGACGAGCTGTACAAGAAAAGCGGCGGTGGCGGATCCCGTCTGCGCCGT
CGTCCGCTGCGGGCCGAAAGCTTCCGCAGAGGTGCAGCTGCAGCAGTCAGGACCTGAACT
GGTGAAGCCTGGGACTTCAGTGAGGATATCCTGCAAGACTTCTGGATACACATTCAGTGAATA
TACCATAACCTGGGTGAAGCAGAGCCATGGAAGAGCCTTGAGTGGATTGGAAACATCAATC
CTAACAATGGTGGTACCACCTACAATCAGAAGTTCGAGGACAAGGCCACATTGACTGTAGAC
AAGTCTCCAGTACAGCCTACATGGAGTCCGCAGCCTAACATCTGAGGATTCTGCAGTCTAT
TATTGTGCAGCTGGTTGGAAGTCTGACTACTGGGGCAAGGGACCACGGTCACCGTCTCCTCA
GGTGGAGGTGGATCAGGTGGAGGTGGATCTGGTGGAGGTGGATCTGACATTGTGATGACCCA
GTCTCACAAATTCATGTCCACATCAGTAGGAGACAGGGTCAGCATCATCTGTAAGGCCAGTCA
AGATGTGGGTACTGCTGTAGACTGGTATCAACAGAAACCAGGACAATCTCCTAAACTACTGAT
TTATTGGGACTCCACTCGGCACACTGGAGTCCCTGATCGCTTACAGGCAGTGGATCTGGGAC
AGACTTCACTCACCATTACTAATGTTTCAGTCTGAAGACTTGGCAGATTATTTCTGCAGCAA
TATAACAGCTATCCCCTCACGTTCCGGTGTGGGACCATGCTGGACCTGAAATAA
```

GFP-SCP protein sequence: (AA=516, MW=56823.4)

```
MGSSHHHHHSSGLVPRGSHMVSKGEELFTGVVPIVELDGDVNGHKFSVSGEGEGDATYGLKLT
LKFICTTGKLPVPWPTLVTTLYGVQCFSRYPDHMKQHDFFKSAMPEGYVQERTIFFKDDGNYKT
RAEVKFEQDGLVNRIELKIDFKEDGNILGHKLEYNYNHNVYIMADKQKNGIKVNFKIRHNIEDG
SVQLADHYQQNTPIGDGPVLLPDNHVLSQTSALSKDPNEKRDMVLLFEVTAAGITLGMDELYKK
SGGGNSRRRRRRRRGRKASAEVQLQQSGPELVKPGTTSVRISCKTSGYTFTEYTIHWVKQSHGKSLE
WIGNINPNNGGTTYNQKFEKATLTVDKSSSTAYMELRSLTSEDSAVYYCAAGWNFDYWGQGT
VTVSSGGGGSGGGGSGGGSDIVMTQSHKFMSTSVGDRVSIICKASQDVGTAVDWYQKPKQSP
KLLIYWASTRHTGVPDRFTGSGSGTDFLTITNVQSEDLADYFCQQYNSYPLTFGAGTMLDLK
```

##### B.

dsRB-SCP DNA sequence: (b.p=1338)

```
ATGGGCAGCAGCCATCATCATCATCACAGCAGCGGCCTGGTGCCGCGCGGCAGCCATAT
GATGGCTGGTGATCTTTCAGCAGGTTTCTTCATGGAGGAACCTTAATACATACCGTCAGAAGCA
GGGAGTAGTACTTAAATATCAAGAAGTGCCTAATTCAGGACCTCCACATGATAGGAGGTTTAC
ATTTCAAGTTATAATAGATGGAAGAGAATTTCCAGAAGGTGAAGGTAGATCAAAGAAGGAAG
CAAAAAATGCCGAGCCAAATTAGCTGTTGAGATACTTAATAAGGAAAAGAAGGCAGTTAGT
CCTTTATTATTGACAACAACGAATTCTTCAGAAGGATTATCCATGGGGAATTACATAGGCCTT
ATCAATAGAATTGCCGAGAAGAAAAGACTAACTGTAATTATGAACAGTGTGCATCGGGGGT
GCATGGGCCAGAAGGATTTTATTATAAATGCAAAATGGGACAGAAAAGAAATATAGTATTGGTA
CAGGTTCTACTAAACAGGAAGCAAAAACAAATGGCGGCCAAACTGGCCTATCTGCAGATCTTAT
CGGAGAGCGGCGGTGGCGGATCCCGTCTGTCGCCGTCTGCGCCGTCGCGGCCGCAAAAGCTTC
```

GCAGAGGTGCAGCTGCAGCAGTCAGGACCTGAACTGGTGAAGCCTGGGACTTCAGTGAGGAT  
 ATCTGCAAGACTTCTGGATACACATTCACTGAATATAACCATACTGGGTGAAGCAGAGCCA  
 TGGAAAGAGCCTTGAGTGGATTGAAAACATCAATCCTAACAAATGGTGGTACCACCTACAATC  
 AGAAGTTCGAGGACAAGGCCACATTGACTGTAGACAAGTCCTCCAGTACAGCCTACATGGAG  
 CTCCGCAGCCTAACATCTGAGGATTCTGCAGTCTATTATTGTGCAGCTGGTTGGAACCTTGACT  
 ACTGGGGCCAAGGGACCACGGTCACCGTCTCCTCAGGTGGAGGTGGATCAGGTGGAGGTGGA  
 TCTGGTGGAGGTGGATCTGACATTGTGATGACCCAGTCTCACAAATTCATGTCCACATCAGTA  
 GGAGACAGGGTTCAGCATCATCTGTAAGGCCAGTCAAGATGTGGGTACTGCTGTAGACTGGTA  
 TCAACAGAAACCAGGACAATCTCCTAAACTACTGATTTATTGGGCATCCACTCGGCACACTGG  
 AGTCCCTGATCGCTTACAGGCAGTGGATCTGGGACAGACTTCACTCTCACCATTACTAATGT  
 TCAGTCTGAAGACTTGGCAGATTATTTCTGTGACAAATAACAGCTATCCCCTCACGTTCCGGT  
 GCTGGGACCATGCTGGACCTGAAA

dsRB-SCP protein sequence: (AA=446, MW=48614.3)

MGSSHHHHHSSGLVPRGSHMMAGDLSAGFFMEELNTYRQKQGVVLKYQELPNSGPPHRRFTF  
 QVIIDGREFPEGEGRSKKEAKNAAKLA VEILNKEKKAVSPLLLTTNSSEGLSMGNYIGLINRIAQ  
 KKRLTVNIEQCASGVHGPFGFHYKCKMGQKEYSIGTGSTKQEAQLAAKLAYLQILSES GGGGS  
 RRRRRRRRGRKASAEVQLQQSGPELVKPGTSVRISCKTSGYTFTEYTIHWVKQSHGKSLEWIGNIN  
 PNNGGTTYNQKFEDKATLTVDKSSSTAYMELRSLTSEDSAVYYCAAGWNFDYWGQGTTVTVSS  
 GGGGSGGGGSGGGGSDIVMTQSHKFMSTSVGDRVSIICKASQDVGTAVDWYQQKPGQSPKLLIY  
 WASTRHTGVPDRFTGSGSGTDFLTITNVQSEDLADYFCQQYNSYPLTFGAGTMLDLK

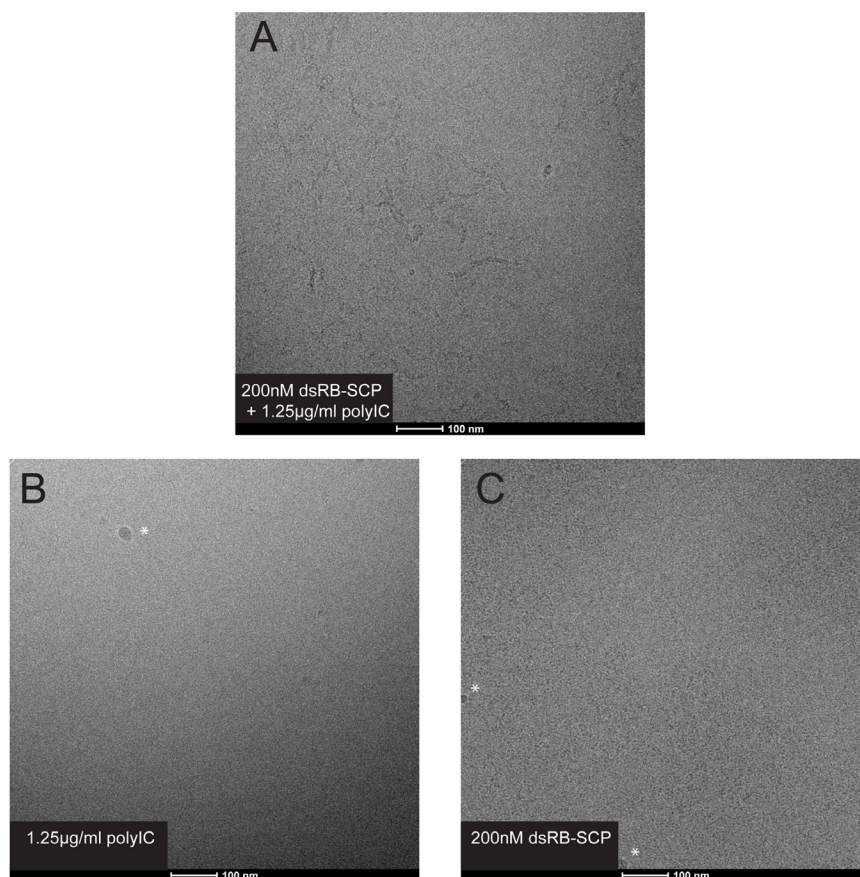

**Supplementary Figure 1: Direct imaging of dsRB-SCP/polyIC complex by cryogenic transmission electron microscopy (cryo-TEM).** A. The dsRB-SCP/polyIC complexes are visualized as chains of beads on elongated filaments, which are about  $114.8 \pm 34.4$  nm in length (mean length) and  $8.2 \pm 3.2$  nm wide (mean width) ( $n=20$ , measurements were done using ImageJ software). B. PolyIC alone is barely visible as extremely thin threads. C. dsRB-SCP alone is dispersed as tiny dots all over the grid. Asterisks indicate ice on the grid.

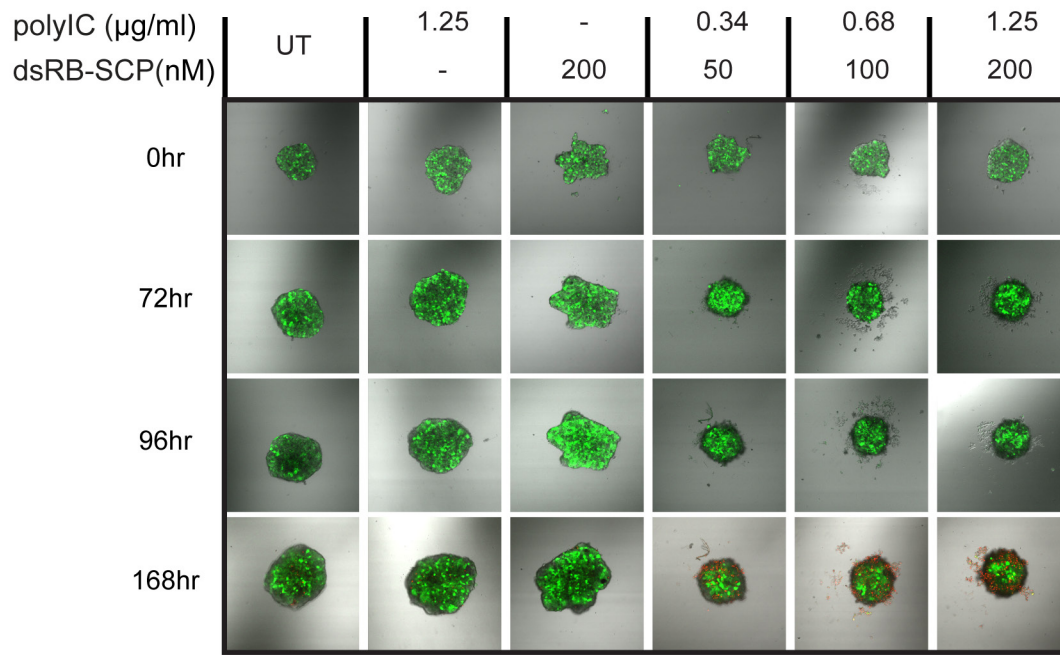

**Supplementary Figure 2: Complete time course of treatment with dsRB-SCP/polyIC of LNCaP-Luc/GFP spheroids in the absence of PBMCs.** The endpoints only (168 h) are also shown in Figure 6, lower panel. Refer to Figure 6 for detailed description.
